# Supplementary material for: Phenol hydrodeoxygenation: effect of support and Re promoter on the reactivity of Co catalysts
Source: Royal Society of Chemistry journal article supplement (doi:10.1039/c6cy01038e), 2016-01-01
Supplement: c6cy01038e1.pdf [file c6cy01038e1.pdf]

## Phenol hydrodeoxygenation: Effect of support and Re promoter on the reactivity of Co catalysts

I.T. Ghampson<sup>a,\*</sup>, C. Sepúlveda<sup>b</sup>, A.B. Dongil<sup>b</sup>, G. Pecchi<sup>b</sup>, R. García<sup>b</sup>, J.L.G. Fierro<sup>c</sup>, N. Escalona<sup>a,d,\*\*</sup>

<sup>a</sup>*Departamento de Ingeniería Química y Bioprocesos, Escuela de Ingeniería, Pontificia Universidad Católica de Chile, Avenida Vicuña Mackenna 4860, Macul, Santiago, 7820436, Chile.*

<sup>b</sup>*Universidad de Concepción, Facultad de Ciencias Químicas, Casilla 160c, Concepción, Chile*

<sup>c</sup>*Instituto de Catálisis y Petroleoquímica, CSIC, Cantoblanco, 28049 Madrid, Spain*

<sup>d</sup>*Departamento de Físicoquímica, Facultad de Químicas, Pontificia Universidad Católica de Chile, Santiago, 7820436, Chile*

\*Corresponding authors:

\* *Dr. I. Tyrone Ghampson, e-mail: [isghampson@uc.cl](mailto:isghampson@uc.cl)*

\*\* *Dr. Nestor Escalona, e-mail: [neescalona@ing.puc.cl](mailto:neescalona@ing.puc.cl)*

**Table S1** Conversion of phenol intermediates over Co/Al<sub>2</sub>O<sub>3</sub> catalyst at 300 °C, 3 MPa H<sub>2</sub>, 4 h

| Substrate(s)                                                                        | Conv. (%) | Products distribution (%)                                                         |                                                                                   |                                                                                   |                                                                                    |                                                                                     |                     |
|-------------------------------------------------------------------------------------|-----------|-----------------------------------------------------------------------------------|-----------------------------------------------------------------------------------|-----------------------------------------------------------------------------------|------------------------------------------------------------------------------------|-------------------------------------------------------------------------------------|---------------------|
|                                                                                     |           | 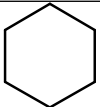 |  |  |  |  | Alkylation products |
|    | 10        | 100                                                                               | -                                                                                 | -                                                                                 | -                                                                                  | -                                                                                   | -                   |
|  * | 100       | 44                                                                                | 1                                                                                 | 48                                                                                | -                                                                                  | 1                                                                                   | -                   |
|    | 100       | 93                                                                                |                                                                                   | 7                                                                                 |                                                                                    |                                                                                     |                     |
|   | 100       | 76                                                                                | 1                                                                                 | 9                                                                                 | 5                                                                                  | -                                                                                   | 9                   |
|  | 33        |                                                                                   |                                                                                   |                                                                                   |                                                                                    |                                                                                     |                     |
|  | 3.3       | 95                                                                                | 5                                                                                 | -                                                                                 | -                                                                                  | -                                                                                   | -                   |
|  | 100       |                                                                                   |                                                                                   |                                                                                   |                                                                                    |                                                                                     |                     |
|  | 26.1      | 51                                                                                | -                                                                                 | -                                                                                 | -                                                                                  | 3                                                                                   | 46                  |
|  | 89.2      |                                                                                   |                                                                                   |                                                                                   |                                                                                    |                                                                                     |                     |

\* Products from hydrocracking of cyclohexane accounted for 5% of the products.

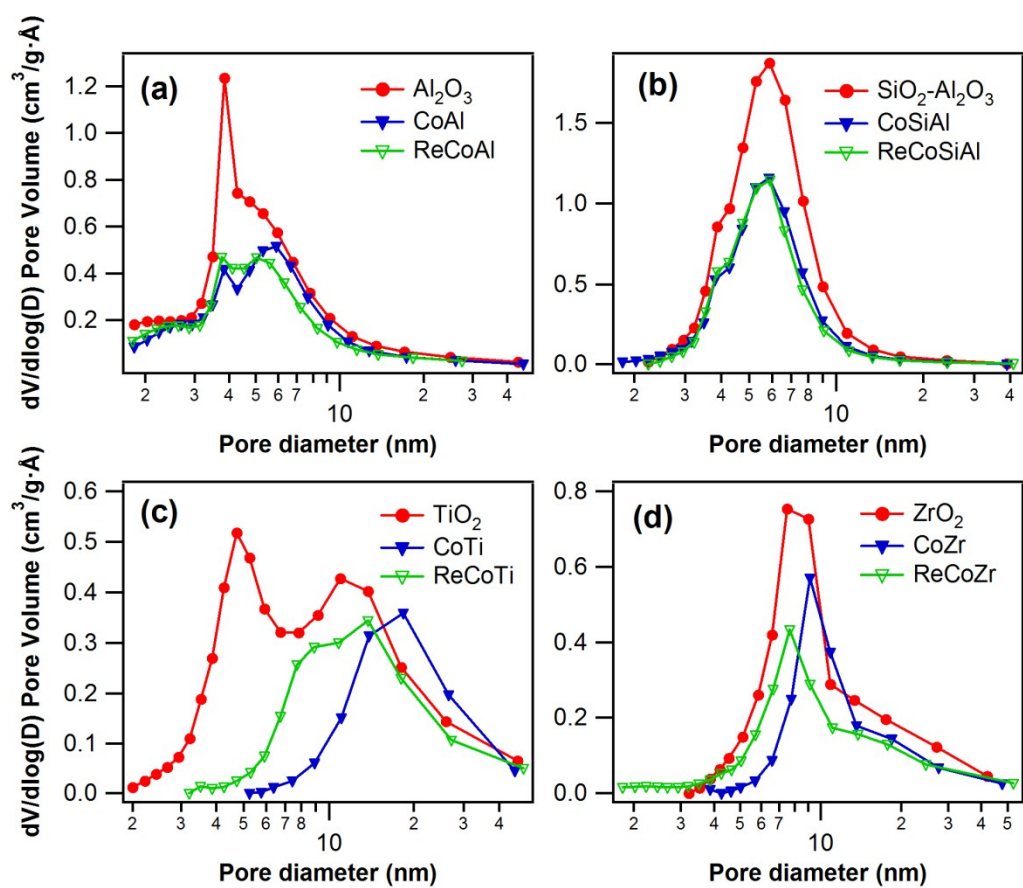

**Figure S1.** BJH pore size distributions of calcined (a)  $\text{Al}_2\text{O}_3$ -supported, (b)  $\text{SiO}_2\text{-Al}_2\text{O}_3$ -supported, (c)  $\text{TiO}_2$ -supported, and (d)  $\text{ZrO}_2$ -supported catalysts

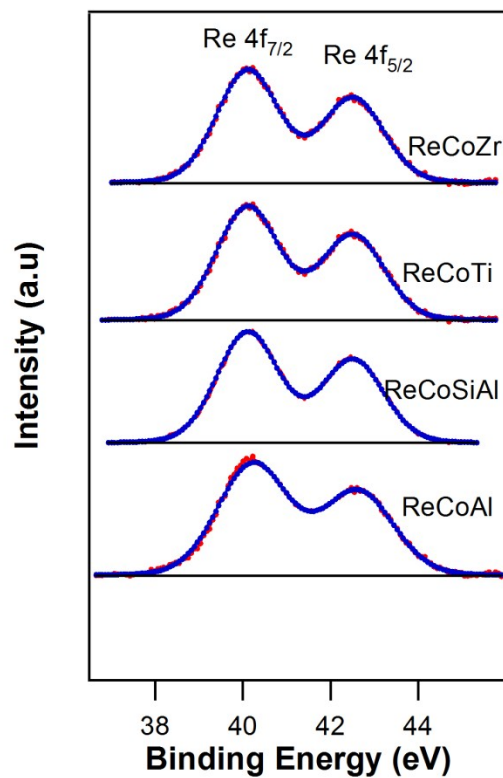

**Figure S2.** Re 4f core level spectra of reduced-passivated supported Re-Co catalysts. Reduction conditions to remove the passivation layer: 50 mL min<sup>-1</sup> H<sub>2</sub>, 300 °C, 1 h

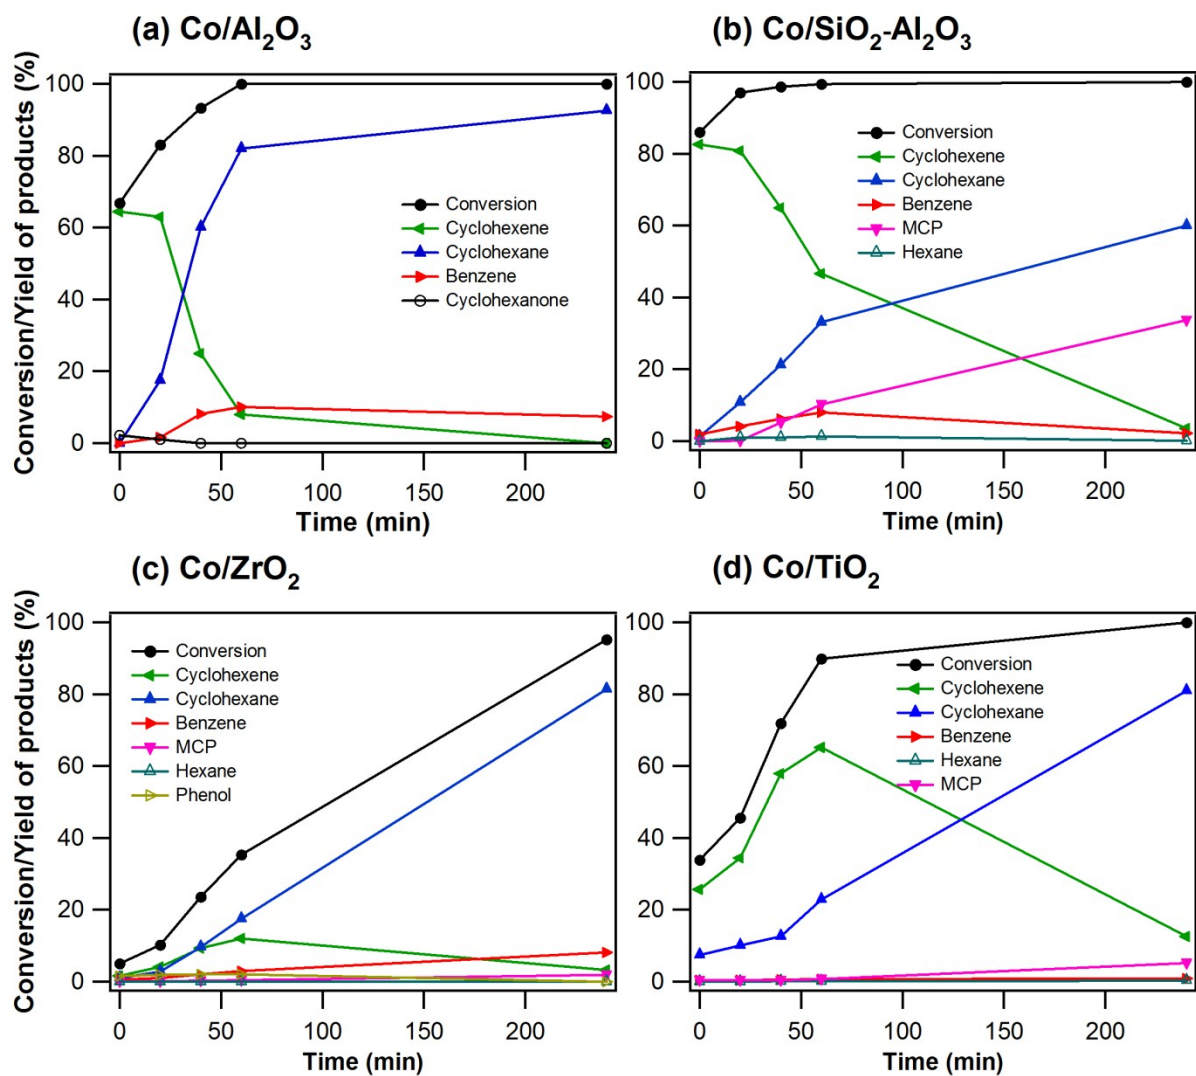

**Figure S3.** Variation of the conversion of cyclohexanol and the yield of products with time over Co/Al<sub>2</sub>O<sub>3</sub> catalyst. Reaction conditions: cyclohexanol (1.98 mL, 19 mmol), catalyst (100 mg), dodecane (80 mL), 300 °C, 3 MPa H<sub>2</sub>.

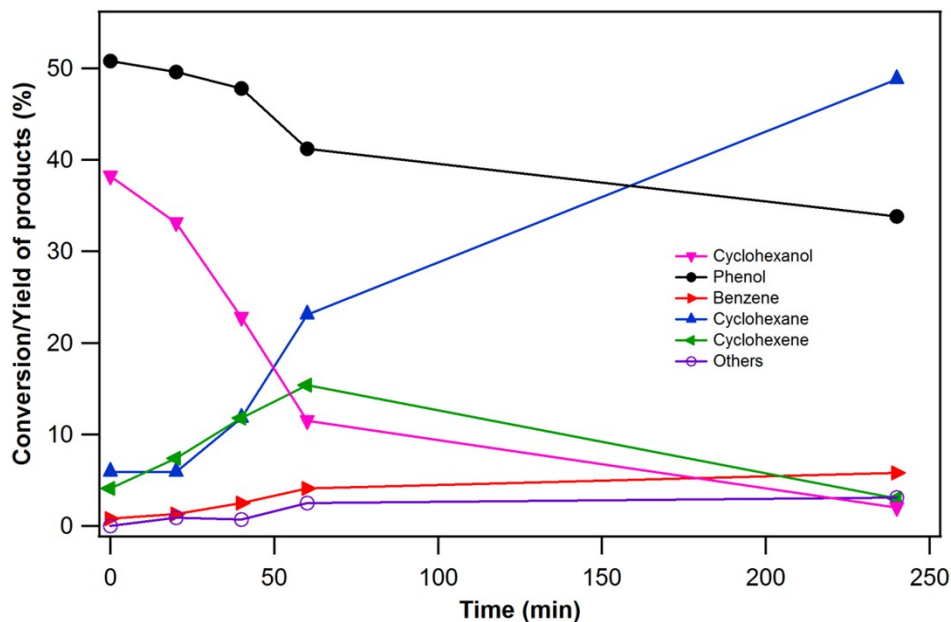

**Figure S4.** Variation of the conversion of phenol and cyclohexanol, and the yield of products with time over  $\text{Co}/\text{Al}_2\text{O}_3$  catalyst. Reaction conditions: phenol (1.8 g, 19.1 mmol), catalyst (200 mg), dodecane (80 mL), 300 °C, 3 MPa  $\text{H}_2$ .

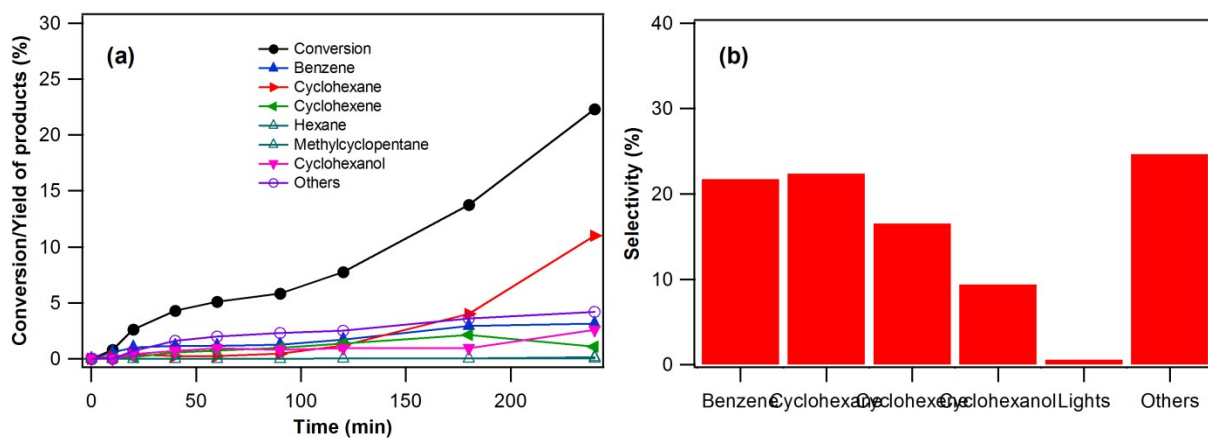

**Figure S5.** (a) Time-course of the conversion of phenol, and (b) Products selectivity calculated at 10% phenol conversion over unpassivated  $\text{Co}/\text{Al}_2\text{O}_3$  catalyst. Reaction conditions: phenol (1.8 g, 19.1 mmol), catalyst (200 mg), dodecane (80 mL), 300 °C, 3 MPa  $\text{H}_2$ .

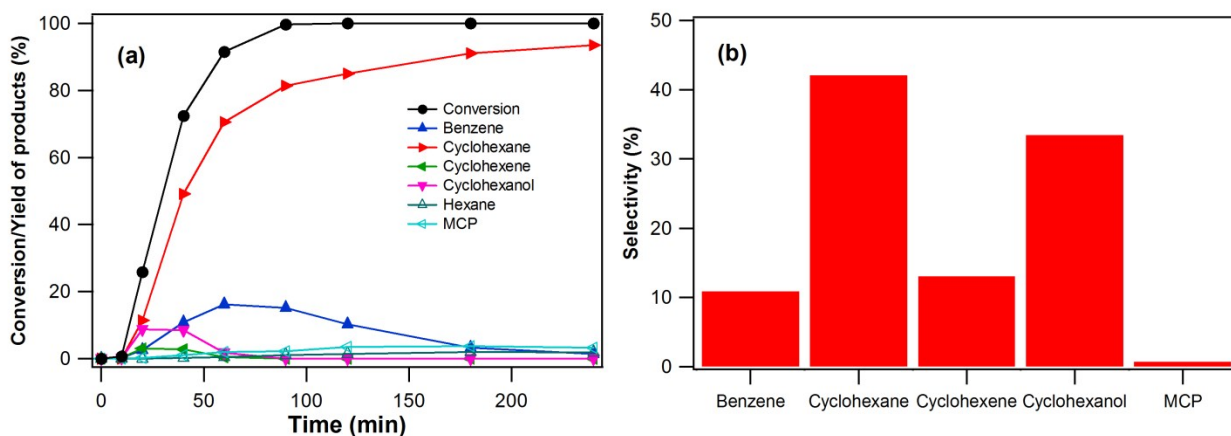

**Figure S6.** (a) Time-course of the conversion of phenol, and (b) products selectivity calculated at 10% phenol conversion over Co/SiO<sub>2</sub> catalyst. Reaction conditions: phenol (1.8 g, 19.1 mmol), catalyst (200 mg), dodecane (80 mL), 300 °C, 3 MPa H<sub>2</sub>.

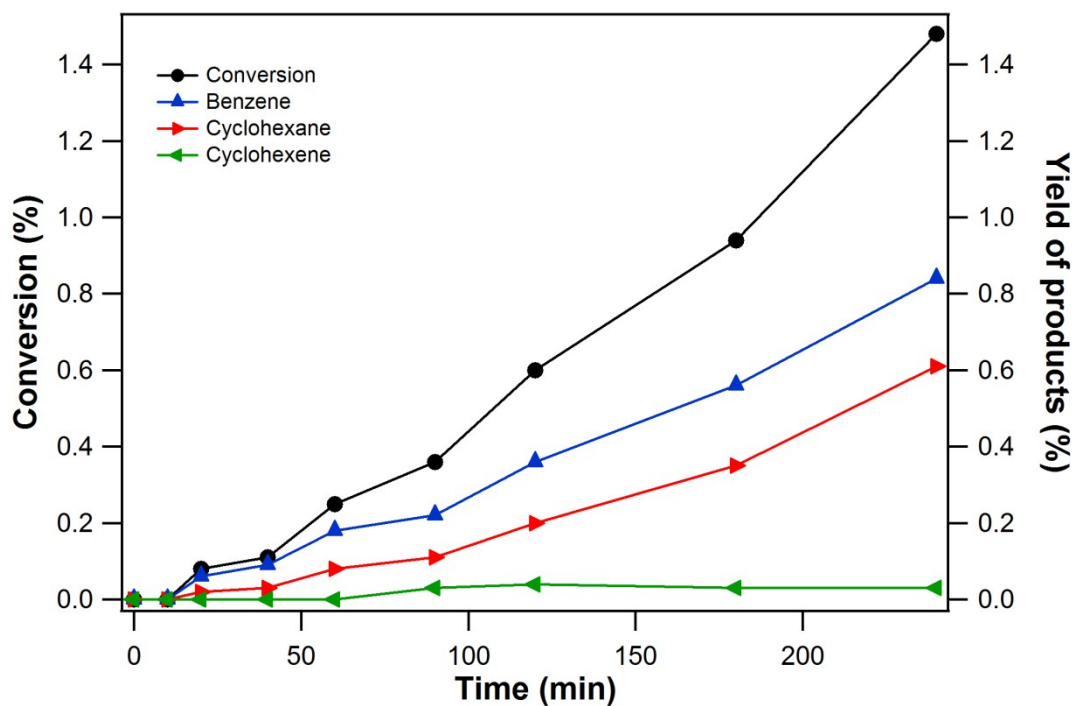

**Figure S7.** Variation of the conversion of phenol and the yield of products with time over Re/SiO<sub>2</sub>-Al<sub>2</sub>O<sub>3</sub> catalyst. Reaction conditions: phenol (1.8 g, 19.1 mmol), catalyst (200 mg), dodecane (80 mL), 300 °C, 3 MPa H<sub>2</sub>.
